# Supplementary material for: Using the multiple streams model to elicit an initial programme theory: from policy dialogues to a roadmap for scaling up integrated care
Source: PubMed Central journal article supplement — BMJ Glob Health. 2023 Sep 19;8(9):e012637. doi: 10.1136/bmjgh-2023-012637 (PMC10510919; doi:10.1136/bmjgh-2023-012637), 2023-09-19
Supplement: bmjgh-2023-012637supp001.pdf [file bmjgh-2023-012637supp001.pdf]

### Appendix 1: Three-dimensional scale-up framework

## Comprehensive scale-up

## Types of strategy

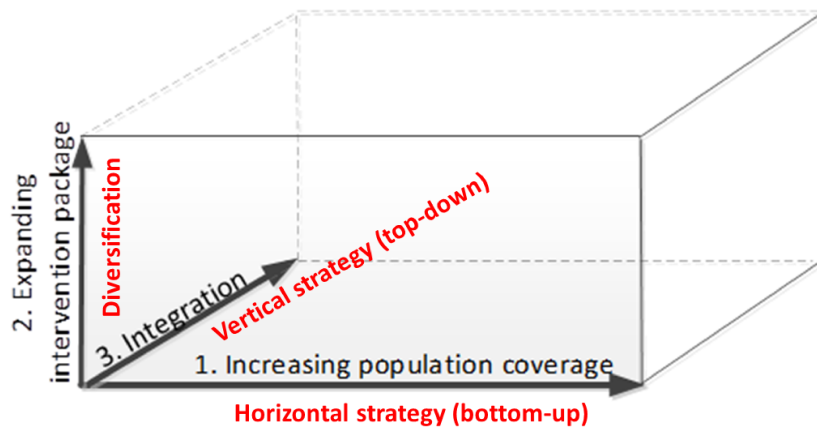

Adapted from: van Olmen J, Menon S, Poplas Susic A, et al. Scale-up integrated care for diabetes and hypertension in Cambodia, Slovenia and Belgium (SCUBY): a study design for a quasi-experimental multiple case study. *Global health action* 2020;13(1):1824382
