# Supplementary material for: Using the multiple streams model to elicit an initial programme theory: from policy dialogues to a roadmap for scaling up integrated care
Source: PubMed Central journal article supplement — BMJ Glob Health. 2023 Sep 19;8(9):e012637. doi: 10.1136/bmjgh-2023-012637 (PMC10510919; doi:10.1136/bmjgh-2023-012637), 2023-09-19
Supplement: bmjgh-2023-012637supp003.pdf [file bmjgh-2023-012637supp003.pdf]

**Appendix 3: Summative overview of the roadmap exhibiting the interrelatedness between actors, context, and roadmap actions**

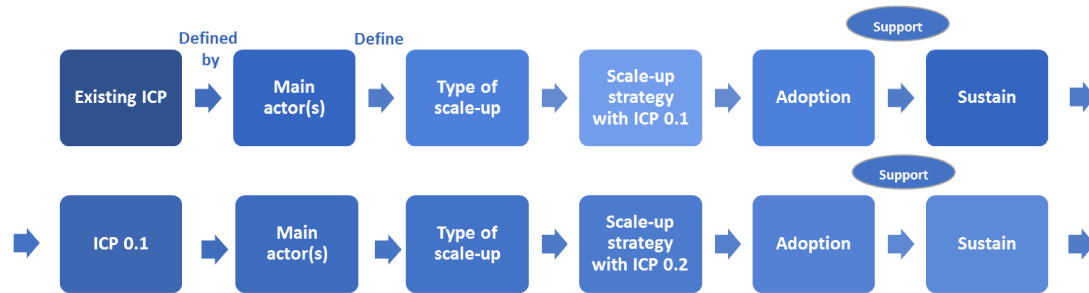

From: van Olmen J, Menon S, Poplas Susic A, et al. 2020. Scale-up integrated care for diabetes and hypertension in Cambodia, Slovenia and Belgium (SCUBY): a study design for a quasi-experimental multiple case study. *Glob Health Action*, 13: 1824382
