# Supplementary figures and images for: Using the multiple streams model to elicit an initial programme theory: from policy dialogues to a roadmap for scaling up integrated care
Source: PubMed Central journal article supplement — BMJ Glob Health. 2023 Sep 19;8(9):e012637. doi: 10.1136/bmjgh-2023-012637 (PMC10510919; doi:10.1136/bmjgh-2023-012637), 2023-09-19

**Appendix 2: Relationship between policy dialogue, evidence and roadmap**

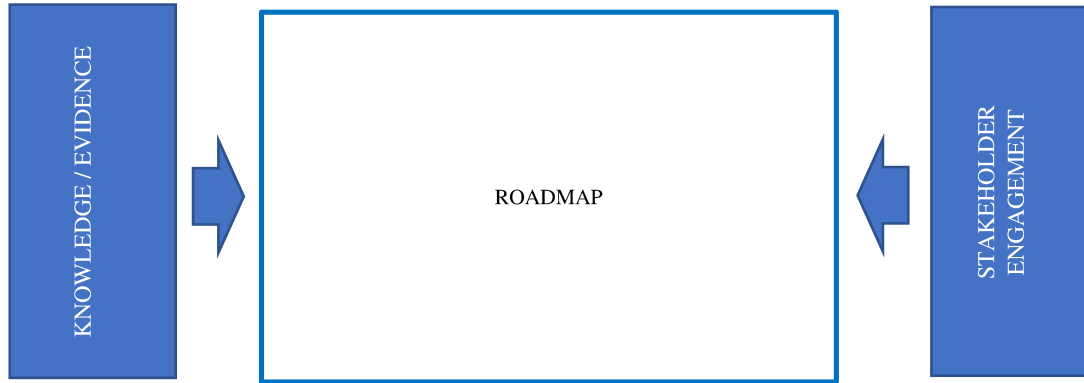

Supplement: bmjgh-2023-012637supp002.pdf [file bmjgh-2023-012637supp002.pdf]

**Appendix 4: Process of roadmap development and evaluation**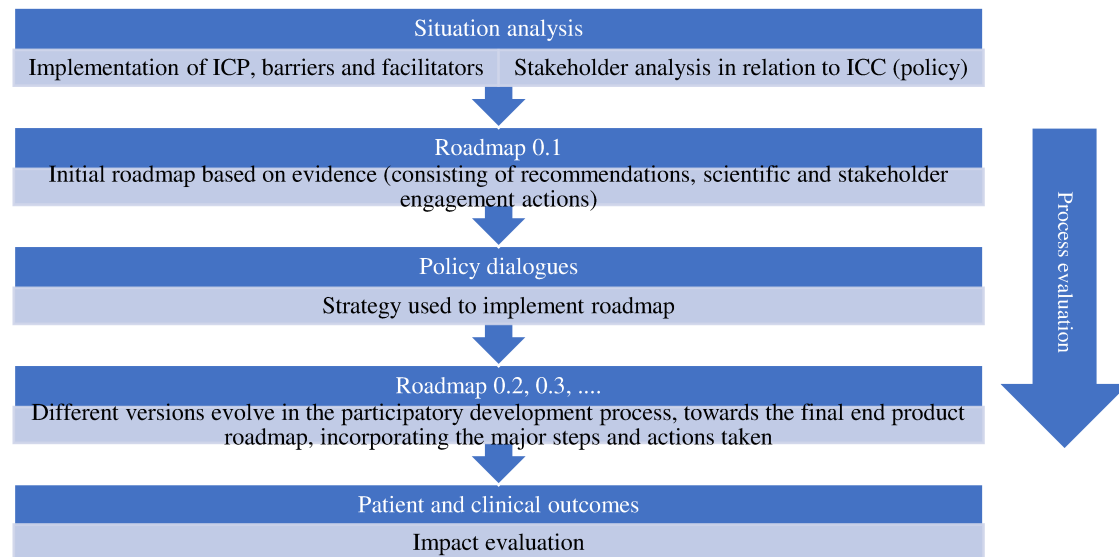

Supplement: bmjgh-2023-012637supp004.pdf [file bmjgh-2023-012637supp004.pdf]
